# Supplementary material for: Co-existing feedback loops generate tissue-specific circadian rhythms
Source: PubMed Central journal article supplement (PMC6238625; doi:10.26508/lsa.201800078), 2018-06-14
Supplement: LSA-2018-00078_Supplementary_Information_2.pdf [file LSA-2018-00078_Supplementary_Information_2.pdf]

## S2 Parameter sets

Here we list sample parameter sets for each tissue with their score and minimal oscillators. The score was given according to the scoring function in Supplement S3. "Minimal oscillator" refers to the finding, that the listed loops can synergistically generate oscillations, if they are not clamped. Minimal means that at least these loops need to be active. The models shown here are taken from the top scoring fits of each tissue.

### adrenal gland

**score:** 0.091

**oscillator:** *Bmal1/Rev-erb- $\alpha$*  + Repressilator

| del1 | del2 | del3 | del4 | del5 | d1   | d2   | d3   | d4   | d5   |
|------|------|------|------|------|------|------|------|------|------|
| 5.06 | 0.49 | 2.88 | 5.55 | 5.28 | 0.30 | 0.48 | 0.26 | 0.56 | 0.33 |

| ar1  | ar4  | cr2  | cr3  | cr4  | cr5  | gr2  | gr3  | gr4  | gr5  | b_RevErb | ba2  | b_Per2 | ba3  |      |
|------|------|------|------|------|------|------|------|------|------|----------|------|--------|------|------|
| 1.29 | 9.02 | 1.69 | 7.16 | 2.99 | 1.87 | 4.50 | 0.38 | 0.98 | 0.40 |          | 3.65 | 0.37   | 1.15 | 2.36 |

| b_Cry1 | ba4   | b_Dbp | ba5  | fa2   | f_RevErbA | fa3  | d_Per2 | fa4  | d_Cry1 |      |
|--------|-------|-------|------|-------|-----------|------|--------|------|--------|------|
| 1.17   | 11.34 | 6.56  | 0.19 | 42.91 |           | 4.65 | 6.06   | 5.08 | 1.00   | 4.29 |

# kidney

score: 0.090

**oscillator 1:** Bmal1/Reverba + Per2 + Per2/Dbp + Repressilator

**oscillator 2:** Bmal1/Reverba + Per2/Dbp + Cry1 + Repressilator

**oscillator 3:** Bmal1/Reverba + Per2/Dbp + Cry1/Dbp + Repressilator

| del1 | del2 | del3 | del4 | del5 | d1   | d2   | d3   | d4   | d5   |
|------|------|------|------|------|------|------|------|------|------|
| 5.65 | 0.88 | 5.34 | 4.81 | 4.50 | 0.50 | 0.73 | 0.41 | 0.27 | 0.43 |

| ar1  | ar4  | cr2  | cr3  | cr4  | cr5  | gr2  | gr3  | gr4  | gr5  | b_RevErb | ba2  | b_Per2 | ba3  |
|------|------|------|------|------|------|------|------|------|------|----------|------|--------|------|
| 1.51 | 2.99 | 1.92 | 4.82 | 1.95 | 0.71 | 4.04 | 0.23 | 0.19 | 0.42 | 2.69     | 0.34 | 1.50   | 9.62 |

| b_Cry1 | ba4  | b_Dbp | ba5  | fa2   | f_RevErbA | fa3  | d_Per2 | fa4  | d_Cry1 |
|--------|------|-------|------|-------|-----------|------|--------|------|--------|
| 1.23   | 0.82 | 3.50  | 0.04 | 12.02 | 2.09      | 4.22 | 5.87   | 1.55 | 4.25   |

# liver

score: 0.014

**oscillator 1:** Bmal1/Reverba + Per2/Dbp + Repressilator

**oscillator 2:** Bmal1/Reverba + Cry1 + Repressilator

| del1 | del2 | del3 | del4 | del5 | d1   | d2   | d3   | d4   | d5   |
|------|------|------|------|------|------|------|------|------|------|
| 5.83 | 0.74 | 2.74 | 3.35 | 5.29 | 0.29 | 0.77 | 0.42 | 0.23 | 0.42 |

| ar1  | ar4  | cr2  | cr3   | cr4   | cr5  | gr2  | gr3  | gr4  | gr5  | b_RevErb | ba2  | b_Per2 | ba3  |
|------|------|------|-------|-------|------|------|------|------|------|----------|------|--------|------|
| 1.83 | 4.40 | 0.84 | 14.82 | 12.16 | 3.16 | 8.03 | 0.87 | 1.83 | 0.67 | 4.06     | 0.12 | 1.81   | 3.45 |

| b_Cry1 | ba4  | b_Dbp | ba5  | fa2   | f_RevErbA | fa3  | d_Per2 | fa4  | d_Cry1 |
|--------|------|-------|------|-------|-----------|------|--------|------|--------|
| 1.66   | 0.52 | 4.40  | 0.90 | 12.68 | 2.61      | 1.74 | 4.03   | 4.15 | 5.59   |

# SCN

score: 3.49

oscillator: Per2/Dbp + Cry1 + Cry1/Dbp

| del1 | del2 | del3 | del4 | del5 | d1   | d2   | d3   | d4   | d5   |
|------|------|------|------|------|------|------|------|------|------|
| 5.44 | 3.87 | 4.25 | 5.83 | 3.72 | 0.39 | 0.49 | 0.45 | 0.10 | 0.32 |

| ar1  | ar4   | cr2  | cr3  | cr4  | cr5  | gr2   | gr3  | gr4  | gr5  | b_RevErb | ba2  | b_Per2 | ba3  |
|------|-------|------|------|------|------|-------|------|------|------|----------|------|--------|------|
| 5.86 | 14.88 | 0.38 | 5.63 | 5.80 | 6.39 | 10.22 | 0.06 | 0.07 | 0.23 | 1.45     | 0.22 | 10.96  | 8.04 |

| b_Cry1 | ba4  | b_Dbp | ba5  | fa2  | f_RevErbA | fa3   | d_Per2 | fa4  | d_Cry1 |
|--------|------|-------|------|------|-----------|-------|--------|------|--------|
| 7.43   | 7.23 | 20.87 | 7.75 | 6.83 | 1.96      | 11.00 | 29.07  | 5.36 | 20.75  |

# heart

score: 0.19

oscillator: Bmal1/Reverba

| del1 | del2 | del3 | del4 | del5 | d1   | d2   | d3   | d4   | d5   |
|------|------|------|------|------|------|------|------|------|------|
| 5.62 | 1.47 | 3.87 | 2.37 | 4.46 | 0.36 | 0.46 | 0.95 | 0.22 | 0.92 |

| ar1  | ar4   | cr2  | cr3  | cr4   | cr5  | gr2  | gr3  | gr4  | gr5  | b_RevErb | ba2  | b_Per2 | ba3  |
|------|-------|------|------|-------|------|------|------|------|------|----------|------|--------|------|
| 3.52 | 20.43 | 9.97 | 5.68 | 11.03 | 2.56 | 4.09 | 0.11 | 0.18 | 0.05 | 5.71     | 1.00 | 4.39   | 7.50 |

| b_Cry1 | ba4   | b_Dbp | ba5  | fa2   | f_RevErbA | fa3   | d_Per2 | fa4  | d_Cry1 |
|--------|-------|-------|------|-------|-----------|-------|--------|------|--------|
| 3.69   | 12.35 | 10.62 | 0.07 | 21.22 | 2.85      | 15.87 | 16.60  | 4.75 | 5.31   |

## skeletal muscle

score: 1.1

oscillator 1: Bmal1/Reverba + Per2

oscillator 2: Bmal1/Reverba + Per2 + Per2/Dbp

oscillator 3: Bmal1/Reverba + Per2 + Cry1

oscillator 4: Bmal1/Reverba + Per2/Dbp + Cry1

| del1 | del2 | del3 | del4 | del5 | d1   | d2   | d3   | d4   | d5   |
|------|------|------|------|------|------|------|------|------|------|
| 4.08 | 4.58 | 5.98 | 4.76 | 3.37 | 0.72 | 0.94 | 0.35 | 0.37 | 0.16 |

| ar1  | ar4   | cr2   | cr3  | cr4  | cr5  | gr2  | gr3  | gr4  | gr5   | b_RevErb | ba2  | b_Per2 | ba3   |
|------|-------|-------|------|------|------|------|------|------|-------|----------|------|--------|-------|
| 5.54 | 18.49 | 12.63 | 1.15 | 6.96 | 0.19 | 5.32 | 0.94 | 2.89 | 11.30 | 13.03    | 4.74 | 1.00   | 14.65 |

| b_Cry1 | ba4  | b_Dbp | ba5  | fa2  | f_RevErbA | fa3   | d_Per2 | fa4   | d_Cry1 |
|--------|------|-------|------|------|-----------|-------|--------|-------|--------|
| 3.60   | 9.70 | 11.95 | 0.18 | 6.88 | 4.22      | 30.74 | 21.44  | 32.56 | 13.75  |

## brown adipose

score: 0.276

oscillator: Bmal1/Reverba

| del1 | del2 | del3 | del4 | del5 | d1   | d2   | d3   | d4   | d5   |
|------|------|------|------|------|------|------|------|------|------|
| 5.60 | 0.52 | 2.92 | 4.27 | 4.77 | 0.23 | 0.84 | 0.71 | 0.28 | 0.32 |

| ar1  | ar4   | cr2  | cr3  | cr4  | cr5  | gr2  | gr3  | gr4  | gr5  | b_RevErb | ba2  | b_Per2 | ba3  |
|------|-------|------|------|------|------|------|------|------|------|----------|------|--------|------|
| 2.48 | 87.53 | 3.71 | 2.79 | 0.19 | 1.67 | 9.08 | 0.15 | 2.96 | 0.44 | 10.62    | 0.88 | 1.04   | 6.23 |

| b_Cry1 | ba4  | b_Dbp | ba5  | fa2   | f_RevErbA | fa3   | d_Per2 | fa4   | d_Cry1 |
|--------|------|-------|------|-------|-----------|-------|--------|-------|--------|
| 1.38   | 7.26 | 22.54 | 0.14 | 22.34 | 3.75      | 10.43 | 4.13   | 10.39 | 4.25   |

## white adipose

score: 0.171

oscillator1: Bmal1/Reverba + Per2/Dbp + Repressilator

oscillator2: Bmal1/Reverba + Cry1 + Repressilator

| del1 | del2 | del3 | del4 | del5 | d1   | d2   | d3   | d4   | d5   |
|------|------|------|------|------|------|------|------|------|------|
| 5.88 | 2.05 | 5.55 | 3.36 | 4.67 | 0.85 | 0.82 | 0.39 | 0.41 | 0.29 |

| ar1  | ar4  | cr2  | cr3  | cr4   | cr5  | gr2  | gr3  | gr4  | gr5  | b_RevErb | ba2  | b_Per2 | ba3  |
|------|------|------|------|-------|------|------|------|------|------|----------|------|--------|------|
| 2.96 | 7.38 | 1.70 | 4.73 | 14.88 | 0.25 | 3.07 | 0.24 | 0.31 | 1.89 | 3.46     | 0.45 | 2.10   | 6.46 |

| b_Cry1 | ba4  | b_Dbp | ba5  | fa2  | f_RevErbA | fa3  | d_Per2 | fa4  | d_Cry1 |
|--------|------|-------|------|------|-----------|------|--------|------|--------|
| 1.04   | 5.69 | 8.07  | 0.06 | 3.43 | 1.51      | 6.83 | 6.44   | 3.31 | 2.79   |

## lung

score: 0.34

oscillator: Bmal1/Reverba

| del1 | del2 | del3 | del4 | del5 | d1   | d2   | d3   | d4   | d5   |
|------|------|------|------|------|------|------|------|------|------|
| 5.50 | 0.59 | 3.01 | 2.88 | 5.32 | 0.18 | 0.78 | 0.45 | 0.23 | 0.34 |

| ar1  | ar4   | cr2  | cr3   | cr4  | cr5  | gr2  | gr3  | gr4  | gr5  | b_RevErb | ba2  | b_Per2 | ba3  |
|------|-------|------|-------|------|------|------|------|------|------|----------|------|--------|------|
| 1.11 | 29.82 | 1.60 | 10.51 | 9.90 | 9.73 | 7.46 | 0.24 | 0.22 | 0.40 | 7.21     | 0.54 | 1.84   | 7.92 |

| b_Cry1 | ba4  | b_Dbp | ba5  | fa2   | f_RevErbA | fa3  | d_Per2 | fa4  | d_Cry1 |
|--------|------|-------|------|-------|-----------|------|--------|------|--------|
| 2.02   | 9.49 | 12.53 | 0.59 | 11.62 | 3.01      | 4.32 | 7.17   | 1.23 | 6.63   |

# cerebellum

score: 0.545

oscillator: Bmal1/Reverba + Cry1

---

| del1 | del2 | del3 | del4 | del5 | d1   | d2   | d3   | d4   | d5   |
|------|------|------|------|------|------|------|------|------|------|
| 5.34 | 0.78 | 2.28 | 4.93 | 4.65 | 0.21 | 0.51 | 0.45 | 0.30 | 0.49 |

---

---

| ar1  | ar4   | cr2   | cr3  | cr4  | cr5   | gr2   | gr3  | gr4  | gr5  | b_RevErb | ba2  | b_Per2 | ba3   |
|------|-------|-------|------|------|-------|-------|------|------|------|----------|------|--------|-------|
| 7.18 | 28.26 | 23.94 | 2.43 | 4.97 | 16.79 | 11.16 | 0.09 | 0.53 | 0.69 | 15.27    | 8.15 | 1.02   | 11.15 |

---

---

| b_Cry1 | ba4   | b_Dbp | ba5  | fa2   | f_RevErbA | fa3  | d_Per2 | fa4  | d_Cry1 |
|--------|-------|-------|------|-------|-----------|------|--------|------|--------|
| 1.72   | 11.22 | 12.75 | 8.61 | 16.32 | 2.68      | 4.91 | 24.98  | 0.83 | 9.36   |

---
